# Supplementary material for: Zinc Piracy as a Mechanism of Neisseria meningitidis for Evasion of Nutritional Immunity
Source: PubMed Central journal article supplement (PMC3814407; doi:10.1371/journal.ppat.1003733), 2013-10-31
Supplement: ppat.1003733.s003.pdf [file ppat.1003733.s003.pdf]

MC58 MRSSFRLKPICFYLMGVTLYHYSYAEDAGRAGSEAQIQVLEDVHVKAKRVPKDKKVFTDARAVSTR  
H44/76 .....  
O53442 .....M..H.....  
Z2491 .....M..H.....  
FAM18 .....M..H.....  
8013 .....M..H.....T.....  
ALPHA14 .....M..H.....  
ALPHA153 .....M..H.....  
ALPHA170 .....M..H.....  
ATCC-13091 .....M..H.....  
MO1-240355 .....M..H.....  
G2136 .....M..H.....  
N1568 .....M..H.....  
MO1-240013 .....M..H.....T.....

MC58 QDIFKSSSENLDNIVRSIPGAFTQQDKSSGIVSLNIRGDSGFGFRVNTMVDGITQTFYSTSTDAGRAG  
H44/76 .....  
O53442 .....  
Z2491 .....  
FAM18 .....  
8013 .....  
ALPHA14 .....  
ALPHA153 .....  
ALPHA170 .....  
ATCC-13091 .....  
MO1-240355 .....  
G2136 .....  
N1568 .....  
MO1-240013 .....

MC58 GSSQFGASVDSNFIAGLDVVKGSFSGSAGINSLAGSANLRTLGVDDVVQGNNTYGLLLKGLTGTNS  
H44/76 .....  
O53442 .....  
Z2491 .....  
FAM18 .....  
8013 .....  
ALPHA14 .....  
ALPHA153 .....  
ALPHA170 .....  
ATCC-13091 .....  
MO1-240355 .....  
G2136 .....  
N1568 .....  
MO1-240013 .....

MC58 TKGNAAMAAIGARKWLESGASVGVLYGHSRRSVAQNYRVGGGGQHIGNFGAEYLERRKQRYFVQEGA  
H44/76 .....  
O53442 .....  
Z2491 .....E...G  
FAM18 .....Q...T.G  
8013 .....Q...T.G  
ALPHA14 .....Q...T.G  
ALPHA153 .....D.Q  
ALPHA170 .....D.Q  
ATCC-13091 .....  
MO1-240355 .....G  
G2136 .....  
N1568 .....  
MO1-240013 .....T.G

MC58 LKFNSDSGKWERDLQRQQWKYPYKNYNN-QELQKYIEEHDKSWRENLAPQYDITPIDPSSLKQQS  
H44/76 .....  
O53442 .....P.....K.....  
Z2491 .....N.....F.KSY.KT.W..QK.DAP.....G.....  
FAM18 .....N.....F..TSY..Q.KDP.K.K....DQ..D.....  
8013 .....N.....F..TSY..Q.KDP.K.K....DQ..D.....  
ALPHA14 .....N.....F..TSY..Q.KDP.K.K....DQ..D.....  
ALPHA153 .....PW..K.E.P.....  
ALPHA170 .....PW..K.E.P.....  
ATCC-13091 .....SW..K.E.P.....  
MO1-240355 .....N.....F..PY.....W.QK..DP.....G.....  
G2136 .....  
N1568 .....P..K....N..K.....  
MO1-240013 .....F..F..H.L..K.DDP.....GQ..D.....

MC58 AGNLFKLEYDGVFNKYTAQFRDLNNTKIGSRKIINRNYQFNYGSLNPNYTNLNLTAAYNSGRQKYPK  
H44/76 .....  
O53442 .....S.A.....  
Z2491 .....  
FAM18 .....S.....  
8013 .....S.A.....  
ALPHA14 .....  
ALPHA153 .....S.A.....  
ALPHA170 .....S.A.....  
ATCC-13091 .....S.A.....  
MO1-240355 .....  
G2136 .....S.A.....  
N1568 .....S.A.....  
MO1-240013 .....

MC58 GSKFTGWGLLKDFETYNNAKILDLNNTATFRLPRETELQTTLGFNYFHNEYGKNRFPEELGLFFDG  
H44/76 .....  
O53442 .....  
Z2491 .....S.....  
FAM18 .....  
8013 .....  
ALPHA14 .....  
ALPHA153 .....  
ALPHA170 .....  
ATCC-13091 .....  
MO1-240355 .....  
G2136 .....  
N1568 .....  
MO1-240013 .....

MC58 PDQDNGLYSYLGRFKGDKLLPQKSTIVQPAGSQYFNTFYFDAALKKDIYRLNYSTNTVGYRFGGGE  
H44/76 .....  
O53442 .....  
Z2491 .....  
FAM18 .....  
8013 .....  
ALPHA14 .....  
ALPHA153 .....  
ALPHA170 .....  
ATCC-13091 .....  
MO1-240355 .....  
G2136 .....  
N1568 .....  
MO1-240013 .....

MC58 YTGYYGSDDEFKRAFGENSPYKXHCNRS~~CGI~~YEPVLKKYGKKRANNHSVSIADFGDYFMPFASY  
H44/76 .....  
O53442 .....S.EG.....  
Z2491 .....Q.....  
FAM18 .....S.EG.....P.L.....  
8013 .....Q.....  
ALPHA14 .....EG.....I.RE.DP.L.....  
ALPHA153 .....S.EG.....P.L.....  
ALPHA170 .....RE.....Q.....  
ATCC-13091 .....S.EG.....RE.....P.L.....  
MO1-240355 .....S.EG.....RE.....P.L.....  
G2136 .....P.L.....G.  
N1568 .....P.L.....  
MO1-240013 .....

MC58 SRTHRMPNIQEMYFSQIGDSGVHTALKPERANTWQFGFNTYKKGLLKQDDTLGLKLVGYRSRIDNY  
H44/76 .....  
O53442 .....  
Z2491 .....I.....  
FAM18 .....  
8013 .....I.....  
ALPHA14 .....  
ALPHA153 .....  
ALPHA170 .....  
ATCC-13091 .....  
MO1-240355 .....  
G2136 .....  
N1568 .....  
MO1-240013 .....

MC58 IHNVYKWWDLNGDIPSWVSSTGLAYTIQHRNFKDKVHKHGFLELNYDYGRFFTNLSYAYQKSTQ  
H44/76 .....  
O53442 .....N.....N.....  
Z2491 .....N.....  
FAM18 .....  
8013 .....N.....  
ALPHA14 .....N.....  
ALPHA153 .....  
ALPHA170 .....N.....  
ATCC-13091 .....  
MO1-240355 .....  
G2136 .....N.....  
N1568 .....N.....  
MO1-240013 .....

MC58 PTNFSDAESPNNASKEDQLKQGYGLSRVVALPRDYGRLEVGT~~R~~WLG~~N~~KLTLGGAMRYFGKSI~~R~~AT  
H44/76 .....  
O53442 .....  
Z2491 .....  
FAM18 .....  
8013 .....  
ALPHA14 .....  
ALPHA153 .....  
ALPHA170 .....  
ATCC-13091 .....  
MO1-240355 .....  
G2136 .....  
N1568 .....  
MO1-240013 .....

MC58 AEERYIDGTNGGNTSNFRQLGKRSIKQTETLARQPLIFDFYAAAYEPKKNLIFRAEVKNLFDRRYID  
 H44/76 .....  
 O53442 .....V.....  
 Z2491 .....  
 FAM18 .....  
 8013 .....  
 ALPHA14 .....V.....  
 ALPHA153 .....V.....  
 ALPHA170 .....V.....  
 ATCC-13091 .....V.....  
 MO1-240355 .....V.....  
 G2136 .....  
 N1568 .....RDV.....  
 MO1-240013 .....

MC58 PLDAGNDAATQRYSSFDPKDKDEDVTCNADKTL**C**NGKYGGT**S**KS**V**LT**N**FARG**R**T**F**LM**T**MSY**K**  
 H44/76 .....  
 O53442 .....E.....  
 Z2491 .....E...D.N...I.....  
 FAM18 .....-G.....  
 8013 .....  
 ALPHA14 .....E...D.N...I.....  
 ALPHA153 .....  
 ALPHA170 .....-G...I.....  
 ATCC-13091 .....E...D.N...I.....  
 MO1-240355 .....E.....  
 G2136 .....-G.....  
 N1568 .....E...D.-G...I.....  
 MO1-240013 .....-G...I.....
